# Supplementary material for: The ion channel ppk301 controls freshwater egg-laying in the mosquito Aedes aegypti
Source: eLife. 2019 May 21;8:e43963. doi: 10.7554/eLife.43963 (PMC6597239; doi:10.7554/eLife.43963)
Supplement: Supplementary file 1. [file elife-43963-supp1.xlsx]

## Sheet: Figure 1C
Figure 1C - eggs with and without access to freshwater blocked by mesh
Cage	Eggs (Mesh)	Eggs (Free access)
1	0	540
2	0	451
3	0	936
4	4	238
5	0	240

## Sheet: Figure 1D-E - ion composition
Figure 1D-E: Molarity of individual ions in dilutions of artificial seawater (from Kester et al., 1967)
			Ion concentration (mM) for dilutions of artificial seawater
Ion	FW	g/kg in 100% ASW	1	0.5	0.25	0.125	0.1	0.075	0.05	0.025	0.01
Cl-	35.453	19.353	545.878	272.939	136.469	68.2347	54.5878	40.9408	27.2939	13.6469	5.45878
Na+	22.9898	10.765	468.251	234.126	117.063	58.5314	46.8251	35.1188	23.4126	11.7063	4.68251
SO4(2-)	96.06	2.711	28.2219	14.111	7.05549	3.52774	2.82219	2.11665	1.4111	0.705549	0.282219
Mg(2+)	24.312	1.295	53.2659	26.6329	13.3165	6.65823	5.32659	3.99494	2.66329	1.33165	0.532659
Ca(2+)	40.08	0.414	10.3293	5.16467	2.58234	1.29117	1.03293	0.774701	0.516467	0.258234	0.103293
K+	39.102	0.387	9.89719	4.9486	2.4743	1.23715	0.989719	0.742289	0.49486	0.24743	0.0989719
HCO3-	61.01	0.142	2.32749	1.16374	0.581872	0.290936	0.232749	0.174562	0.116374	0.0581872	0.0232749
Br-	79.91	0.066	0.825929	0.412965	0.206482	0.103241	0.0825929	0.0619447	0.0412965	0.0206482	0.00825929
Sr(2+)	87.62	0.008	0.0913034	0.0456517	0.0228258	0.0114129	0.00913034	0.00684775	0.00456517	0.00228258	0.000913034
H3BO3	61.83	0.026	0.420508	0.210254	0.105127	0.0525635	0.0420508	0.0315381	0.0210254	0.0105127	0.00420508
F-	19	0.001	0.0526316	0.0263158	0.0131579	0.00657895	0.00526316	0.00394737	0.00263158	0.00131579	0.000526316
Total (mM)			1119.56	559.78	279.89	139.945	111.956	83.9671	55.978	27.989	11.1956
Table of ion concentrations in the dilutions of artificial seawater used in Figure 1D-E, from the recipe of Kester et al., 1967.

## Sheet: Figure 1D - behavior
Figure 1D - Egg-laying preference when presented a choice between freshwater and artificial seawater
Artificial seawater (%)	Egg-laying preference index
0	-0.027027
0	0
0	-0.630435
0	0.0136986
0	1
0	1
0	-0.979798
0	0.0574713
0	-0.0909091
1	-1
1	0.30303
1	-0.155556
1	0.541667
1	-0.171717
1	-0.586957
1	0.621053
1	-0.955556
1	-0.175
1	-1
1	0.466667
1	1
2.5	1
2.5	-0.229167
2.5	-0.123288
2.5	-0.351351
2.5	0.525
2.5	0.275362
2.5	-0.76699
2.5	-0.168831
2.5	-0.243902
2.5	-0.44
2.5	0.115385
2.5	-1
2.5	-0.611111
2.5	0.225225
2.5	-0.294872
2.5	0.682243
2.5	0.28
2.5	-0.148148
2.5	1
5	0.5
5	-0.0724638
5	0.0117647
5	0.0105263
5	0.439024
5	0
5	-0.222222
5	1
5	-1
5	0.515789
5	0
5	0.529412
5	-0.518519
5	-0.534247
5	-0.212766
5	-0.784314
5	-0.460317
5	1
5	0.614458
5	-0.959184
5	0.964286
5	-0.583333
5	-0.483871
5	0.851852
5	0.119048
5	-1
5	-0.833333
5	-1
7.5	-0.214953
7.5	-0.683168
7.5	-0.746835
7.5	-0.846154
7.5	0.0754717
7.5	0.916667
7.5	-0.493976
7.5	0.590361
7.5	-0.510638
7.5	-0.439024
7.5	-0.446154
7.5	1
7.5	0.333333
7.5	-0.928571
7.5	1
7.5	-0.236842
7.5	-0.566667
7.5	0.690476
7.5	0.493333
7.5	0.584906
7.5	0.0227273
7.5	1
7.5	0.711111
7.5	0.333333
7.5	0.963636
7.5	-0.938462
7.5	-0.204301
7.5	-0.152174
7.5	0.947368
10	0.784314
10	0.80531
10	0.372549
10	0.524752
10	-0.54717
10	0.70297
10	0.0434783
10	-0.666667
10	0.306122
10	-0.1
10	-0.425287
10	-1
10	-1
10	-0.949367
10	-0.477273
10	-0.763636
10	0.027027
10	-0.980583
10	-0.944444
10	-0.792208
10	0.80198
10	-1
10	-1
10	-1
10	0.027027
10	1
10	-0.886792
12.5	-1
12.5	0.119266
12.5	0.648649
12.5	0.41573
12.5	-0.740741
12.5	-1
12.5	-1
12.5	-0.533333
12.5	0.0625
12.5	-0.907692
12.5	-0.918367
12.5	-0.960396
12.5	-1
12.5	-0.52381
12.5	0.459459
12.5	-0.978947
12.5	-0.529412
25	-1
25	-1
25	-0.916084
25	-1
25	-1
25	-0.916667
25	-0.906977
25	-0.946667
25	-1
25	-1
50	-1
50	-1
50	-1
50	-1
50	-0.904762
100	-1
100	-1
100	-1
100	-1

## Sheet: Figure 1E
Figure 1E - Pupation (survival) rates for animals transferred to different concentrations of artificial seawater one day after hatching
Artificial seawater (%)	Pupation after 8 days
100	0
100	0
100	0
100	0
100	0
50	0
50	0
50	0
50	0
50	0
37.5	0
37.5	0
37.5	0
37.5	0
37.5	0
25	0.2
25	0.55
25	0.65
25	0.65
25	0.3
12.5	0.9
12.5	0.9
12.5	0.789474
12.5	0.85
12.5	0.75
10	0.95
10	0.85
10	0.95
10	0.9
10	0.947368
5	0.95
5	1
5	0.789474
5	0.95
5	0.9
2.5	0.95
2.5	0.95
2.5	0.95
2.5	0.9
2.5	0.842105
1	0.9
1	0.894737
1	0.842105
1	0.8
1	0.95
0	0.85
0	0.8
0	0.85
0	0.9
0	0.9

## Sheet: Figure 1F
Figure 1F - number of eggs laid by single female mosquitoes given access to a single concentration of NaCl
NaCl concentration (mOsm/kg)	Eggs
0	88
0	77
0	103
0	75
0	55
0	83
0	0
0	97
0	67
0	71
0	79
0	58
0	1
0	101
50	64
50	83
50	67
50	69
50	59
50	65
50	58
50	59
50	27
50	83
50	60
50	47
50	70
50	74
100	39
100	76
100	0
100	85
100	69
100	72
100	77
100	39
100	13
100	64
100	79
100	63
100	49
100	71
100	45
100	0
100	0
100	59
100	53
100	60
100	59
100	57
100	39
100	34
100	40
100	54
100	49
100	53
150	8
150	6
150	10
150	0
150	51
150	80
150	66
150	72
150	64
150	78
150	25
150	66
150	83
150	34
150	2
150	56
150	51
150	44
150	44
150	38
150	38
150	53
150	45
150	24
150	2
150	60
150	6
150	44
200	3
200	70
200	42
200	0
200	56
200	43
200	29
200	47
200	68
200	59
200	58
200	56
200	55
200	0
250	50
250	14
250	1
250	0
250	0
250	0
250	18
250	30
250	0
250	0
250	0
250	11
250	2
250	3

## Sheet: Figure 1G
Figure 1G - number of larvae and pupae alive, measured each day for 8 days, for larvae transferred to different concentations of NaCl one day after hatching
NaCl concentration (mOsm/kg)	day	Number of larvae	Number of pupae	Compounded pupae	Total alive	Replicate
0	0	20	0	0	20	1
0	0	20	0	0	20	2
0	0	20	0	0	20	3
0	0	20	0	0	20	4
0	0	20	0	0	20	5
0	0	20	0	0	20	6
0	0	20	0	0	20	7
0	0	20	0	0	20	8
0	0	20	0	0	20	9
50	0	20	0	0	20	1
50	0	20	0	0	20	2
50	0	20	0	0	20	3
50	0	20	0	0	20	4
50	0	20	0	0	20	5
50	0	20	0	0	20	6
50	0	20	0	0	20	7
50	0	20	0	0	20	8
50	0	20	0	0	20	9
100	0	20	0	0	20	1
100	0	20	0	0	20	2
100	0	20	0	0	20	3
100	0	20	0	0	20	4
100	0	20	0	0	20	5
100	0	20	0	0	20	6
100	0	20	0	0	20	7
100	0	20	0	0	20	8
100	0	20	0	0	20	9
150	0	20	0	0	20	1
150	0	20	0	0	20	2
150	0	20	0	0	20	3
150	0	20	0	0	20	4
150	0	20	0	0	20	5
150	0	20	0	0	20	6
150	0	20	0	0	20	7
150	0	20	0	0	20	8
150	0	20	0	0	20	9
200	0	20	0	0	20	1
200	0	20	0	0	20	2
200	0	20	0	0	20	3
200	0	20	0	0	20	4
200	0	20	0	0	20	5
200	0	20	0	0	20	6
200	0	20	0	0	20	7
200	0	20	0	0	20	8
200	0	20	0	0	20	9
250	0	20	0	0	20	1
250	0	20	0	0	20	2
250	0	20	0	0	20	3
250	0	20	0	0	20	4
250	0	20	0	0	20	5
250	0	20	0	0	20	6
250	0	20	0	0	20	7
250	0	20	0	0	20	8
250	0	20	0	0	20	9
300	0	20	0	0	20	1
300	0	20	0	0	20	2
300	0	20	0	0	20	3
300	0	20	0	0	20	4
300	0	20	0	0	20	5
300	0	20	0	0	20	6
300	0	20	0	0	20	7
300	0	20	0	0	20	8
300	0	20	0	0	20	9
400	0	20	0	0	20	1
400	0	20	0	0	20	2
400	0	20	0	0	20	3
400	0	20	0	0	20	4
400	0	20	0	0	20	5
400	0	20	0	0	20	6
400	0	20	0	0	20	7
400	0	20	0	0	20	8
400	0	20	0	0	20	9
0	1	20	0	0	20	1
0	1	19	0	0	19	2
0	1	18	0	0	18	3
0	1	20	0	0	20	4
0	1	20	0	0	20	5
0	1	20	0	0	20	6
0	1	20	0	0	20	7
0	1	20	0	0	20	8
0	1	20	0	0	20	9
50	1	18	0	0	18	1
50	1	20	0	0	20	2
50	1	19	0	0	19	3
50	1	19	0	0	19	4
50	1	20	0	0	20	5
50	1	19	0	0	19	6
50	1	20	0	0	20	7
50	1	20	0	0	20	8
50	1	20	0	0	20	9
100	1	19	0	0	19	1
100	1	20	0	0	20	2
100	1	19	0	0	19	3
100	1	20	0	0	20	4
100	1	20	0	0	20	5
100	1	20	0	0	20	6
100	1	17	0	0	17	7
100	1	20	0	0	20	8
100	1	20	0	0	20	9
150	1	20	0	0	20	1
150	1	20	0	0	20	2
150	1	20	0	0	20	3
150	1	20	0	0	20	4
150	1	20	0	0	20	5
150	1	20	0	0	20	6
150	1	17	0	0	17	7
150	1	20	0	0	20	8
150	1	20	0	0	20	9
200	1	20	0	0	20	1
200	1	17	0	0	17	2
200	1	20	0	0	20	3
200	1	16	0	0	16	4
200	1	17	0	0	17	5
200	1	20	0	0	20	6
200	1	20	0	0	20	7
200	1	16	0	0	16	8
200	1	19	0	0	19	9
250	1	15	0	0	15	1
250	1	13	0	0	13	2
250	1	8	0	0	8	3
250	1	9	0	0	9	4
250	1	10	0	0	10	5
250	1	11	0	0	11	6
250	1	12	0	0	12	7
250	1	12	0	0	12	8
250	1	10	0	0	10	9
300	1	4	0	0	4	1
300	1	6	0	0	6	2
300	1	9	0	0	9	3
300	1	5	0	0	5	4
300	1	9	0	0	9	5
300	1	10	0	0	10	6
300	1	10	0	0	10	7
300	1	10	0	0	10	8
300	1	5	0	0	5	9
400	1	0	0	0	0	1
400	1	0	0	0	0	2
400	1	0	0	0	0	3
400	1	0	0	0	0	4
400	1	0	0	0	0	5
400	1	0	0	0	0	6
400	1	0	0	0	0	7
400	1	0	0	0	0	8
400	1	0	0	0	0	9
0	2	20	0	0	20	1
0	2	17	0	0	17	2
0	2	18	0	0	18	3
0	2	19	0	0	19	4
0	2	20	0	0	20	5
0	2	20	0	0	20	6
0	2	20	0	0	20	7
0	2	20	0	0	20	8
0	2	20	0	0	20	9
50	2	18	0	0	18	1
50	2	19	0	0	19	2
50	2	19	0	0	19	3
50	2	18	0	0	18	4
50	2	19	0	0	19	5
50	2	17	0	0	17	6
50	2	19	0	0	19	7
50	2	18	0	0	18	8
50	2	20	0	0	20	9
100	2	19	0	0	19	1
100	2	20	0	0	20	2
100	2	18	0	0	18	3
100	2	19	0	0	19	4
100	2	19	0	0	19	5
100	2	20	0	0	20	6
100	2	17	0	0	17	7
100	2	20	0	0	20	8
100	2	18	0	0	18	9
150	2	18	0	0	18	1
150	2	19	0	0	19	2
150	2	19	0	0	19	3
150	2	19	0	0	19	4
150	2	18	0	0	18	5
150	2	17	0	0	17	6
150	2	17	0	0	17	7
150	2	20	0	0	20	8
150	2	19	0	0	19	9
200	2	19	0	0	19	1
200	2	17	0	0	17	2
200	2	14	0	0	14	3
200	2	10	0	0	10	4
200	2	16	0	0	16	5
200	2	17	0	0	17	6
200	2	19	0	0	19	7
200	2	16	0	0	16	8
200	2	19	0	0	19	9
250	2	12	0	0	12	1
250	2	13	0	0	13	2
250	2	2	0	0	2	3
250	2	3	0	0	3	4
250	2	6	0	0	6	5
250	2	6	0	0	6	6
250	2	2	0	0	2	7
250	2	2	0	0	2	8
250	2	4	0	0	4	9
300	2	1	0	0	1	1
300	2	0	0	0	0	2
300	2	3	0	0	3	3
300	2	0	0	0	0	4
300	2	2	0	0	2	5
300	2	1	0	0	1	6
300	2	1	0	0	1	7
300	2	0	0	0	0	8
300	2	0	0	0	0	9
400	2	0	0	0	0	1
400	2	0	0	0	0	2
400	2	0	0	0	0	3
400	2	0	0	0	0	4
400	2	0	0	0	0	5
400	2	0	0	0	0	6
400	2	0	0	0	0	7
400	2	0	0	0	0	8
400	2	0	0	0	0	9
0	3	20	0	0	20	1
0	3	17	0	0	17	2
0	3	19	0	0	19	3
0	3	19	0	0	19	4
0	3	20	0	0	20	5
0	3	20	0	0	20	6
0	3	20	0	0	20	7
0	3	20	0	0	20	8
0	3	20	0	0	20	9
50	3	17	0	0	17	1
50	3	18	0	0	18	2
50	3	17	0	0	17	3
50	3	18	0	0	18	4
50	3	18	0	0	18	5
50	3	17	0	0	17	6
50	3	19	0	0	19	7
50	3	18	0	0	18	8
50	3	18	0	0	18	9
100	3	19	0	0	19	1
100	3	20	0	0	20	2
100	3	18	0	0	18	3
100	3	18	0	0	18	4
100	3	19	0	0	19	5
100	3	16	0	0	16	6
100	3	16	0	0	16	7
100	3	19	0	0	19	8
100	3	18	0	0	18	9
150	3	16	0	0	16	1
150	3	18	0	0	18	2
150	3	18	0	0	18	3
150	3	13	0	0	13	4
150	3	16	0	0	16	5
150	3	15	0	0	15	6
150	3	17	0	0	17	7
150	3	18	0	0	18	8
150	3	18	0	0	18	9
200	3	19	0	0	19	1
200	3	17	0	0	17	2
200	3	12	0	0	12	3
200	3	10	0	0	10	4
200	3	14	0	0	14	5
200	3	15	0	0	15	6
200	3	17	0	0	17	7
200	3	14	0	0	14	8
200	3	15	0	0	15	9
250	3	8	0	0	8	1
250	3	10	0	0	10	2
250	3	1	0	0	1	3
250	3	3	0	0	3	4
250	3	4	0	0	4	5
250	3	5	0	0	5	6
250	3	2	0	0	2	7
250	3	2	0	0	2	8
250	3	3	0	0	3	9
300	3	0	0	0	0	1
300	3	0	0	0	0	2
300	3	3	0	0	3	3
300	3	0	0	0	0	4
300	3	2	0	0	2	5
300	3	0	0	0	0	6
300	3	0	0	0	0	7
300	3	0	0	0	0	8
300	3	0	0	0	0	9
400	3	0	0	0	0	1
400	3	0	0	0	0	2
400	3	0	0	0	0	3
400	3	0	0	0	0	4
400	3	0	0	0	0	5
400	3	0	0	0	0	6
400	3	0	0	0	0	7
400	3	0	0	0	0	8
400	3	0	0	0	0	9
0	4	17	3	3	20	1
0	4	16	0	0	16	2
0	4	16	2	2	18	3
0	4	18	1	1	19	4
0	4	20	0	0	20	5
0	4	19	1	1	20	6
0	4	19	1	1	20	7
0	4	17	2	2	19	8
0	4	16	4	4	20	9
50	4	11	4	4	15	1
50	4	14	3	3	17	2
50	4	14	2	2	16	3
50	4	13	3	3	16	4
50	4	17	1	1	18	5
50	4	13	3	3	16	6
50	4	17	2	2	19	7
50	4	17	0	0	17	8
50	4	17	1	1	18	9
100	4	18	1	1	19	1
100	4	20	0	0	20	2
100	4	14	3	3	17	3
100	4	16	1	1	17	4
100	4	16	2	2	18	5
100	4	14	1	1	15	6
100	4	16	0	0	16	7
100	4	19	0	0	19	8
100	4	12	5	5	17	9
150	4	13	1	1	14	1
150	4	17	1	1	18	2
150	4	17	0	0	17	3
150	4	12	0	0	12	4
150	4	13	0	0	13	5
150	4	14	0	0	14	6
150	4	16	0	0	16	7
150	4	15	1	1	16	8
150	4	17	1	1	18	9
200	4	18	0	0	18	1
200	4	17	0	0	17	2
200	4	8	0	0	8	3
200	4	10	0	0	10	4
200	4	11	0	0	11	5
200	4	12	0	0	12	6
200	4	17	0	0	17	7
200	4	14	0	0	14	8
200	4	11	0	0	11	9
250	4	6	0	0	6	1
250	4	7	0	0	7	2
250	4	1	0	0	1	3
250	4	1	0	0	1	4
250	4	2	0	0	2	5
250	4	4	0	0	4	6
250	4	2	0	0	2	7
250	4	1	0	0	1	8
250	4	2	0	0	2	9
300	4	0	0	0	0	1
300	4	0	0	0	0	2
300	4	3	0	0	3	3
300	4	0	0	0	0	4
300	4	2	0	0	2	5
300	4	0	0	0	0	6
300	4	0	0	0	0	7
300	4	0	0	0	0	8
300	4	0	0	0	0	9
400	4	0	0	0	0	1
400	4	0	0	0	0	2
400	4	0	0	0	0	3
400	4	0	0	0	0	4
400	4	0	0	0	0	5
400	4	0	0	0	0	6
400	4	0	0	0	0	7
400	4	0	0	0	0	8
400	4	0	0	0	0	9
0	5	10	7	10	17	1
0	5	4	12	12	16	2
0	5	8	8	10	16	3
0	5	11	6	7	17	4
0	5	15	5	5	20	5
0	5	9	9	10	18	6
0	5	11	8	9	19	7
0	5	5	12	14	17	8
0	5	8	7	11	15	9
50	5	7	4	8	11	1
50	5	9	5	8	14	2
50	5	7	6	8	13	3
50	5	6	5	8	11	4
50	5	7	10	11	17	5
50	5	3	9	12	12	6
50	5	8	8	10	16	7
50	5	10	6	6	16	8
50	5	7	11	12	18	9
100	5	13	5	6	18	1
100	5	15	4	4	19	2
100	5	5	8	11	13	3
100	5	8	6	7	14	4
100	5	9	6	8	15	5
100	5	6	6	7	12	6
100	5	6	9	9	15	7
100	5	8	9	9	17	8
100	5	6	5	10	11	9
150	5	6	7	8	13	1
150	5	10	6	7	16	2
150	5	9	5	5	14	3
150	5	8	3	3	11	4
150	5	7	6	6	13	5
150	5	8	6	6	14	6
150	5	8	7	7	15	7
150	5	10	6	7	16	8
150	5	7	8	9	15	9
200	5	16	2	2	18	1
200	5	13	4	4	17	2
200	5	7	1	1	8	3
200	5	4	1	1	5	4
200	5	8		0	8	5
200	5	6	2	2	8	6
200	5	9	2	2	11	7
200	5	14	2	2	16	8
200	5	12	2	2	14	9
250	5	10	1	1	11	1
250	5	4	1	1	5	2
250	5	8	0	0	8	3
250	5	1	0	0	1	4
250	5	1	0	0	1	5
250	5	1	0	0	1	6
250	5	4	0	0	4	7
250	5	2	0	0	2	8
250	5	1	0	0	1	9
300	5	1	0	0	1	1
300	5	0	0	0	0	2
300	5	0	0	0	0	3
300	5	3	0	0	3	4
300	5	0	0	0	0	5
300	5	2	0	0	2	6
300	5	0	0	0	0	7
300	5	0	0	0	0	8
300	5	0	0	0	0	9
400	5	0	0	0	0	1
400	5	0	0	0	0	2
400	5	0	0	0	0	3
400	5	0	0	0	0	4
400	5	0	0	0	0	5
400	5	0	0	0	0	6
400	5	0	0	0	0	7
400	5	0	0	0	0	8
400	5	0	0	0	0	9
0	6	6	4	14	10	1
0	6	1	3	15	4	2
0	6	5	4	14	9	3
0	6	5	6	13	11	4
0	6	10	5	10	15	5
0	6	6	3	13	9	6
0	6	5	5	14	10	7
0	6	3	2	16	5	8
0	6	4	4	15	8	9
50	6	2	5	13	7	1
50	6	4	4	12	8	2
50	6	3	3	11	6	3
50	6	5	1	9	6	4
50	6	3	4	15	7	5
50	6	2	1	13	3	6
50	6	3	5	15	8	7
50	6	4	5	11	9	8
50	6	6	1	13	7	9
100	6	6	7	13	13	1
100	6	8	7	11	15	2
100	6	1	3	14	4	3
100	6	3	4	11	7	4
100	6	6	3	11	9	5
100	6	2	3	10	5	6
100	6	3	3	12	6	7
100	6	3	4	13	7	8
100	6	2	4	14	6	9
150	6	2	3	11	5	1
150	6	8	1	8	9	2
150	6	4	5	10	9	3
150	6	1	6	9	7	4
150	6	5	2	8	7	5
150	6	3	5	11	8	6
150	6	3	3	10	6	7
150	6	4	6	13	10	8
150	6	3	5	14	8	9
200	6	6	8	10	14	1
200	6	6	5	9	11	2
200	6	2	4	5	6	3
200	6	4	5	6	9	4
200	6		6	6	6	5
200	6	2	7	9	9	6
200	6	5	7	9	12	7
200	6	6	6	8	12	8
200	6	3	7	9	10	9
250	6	1	3	4	4	1
250	6	5	1	2	6	2
250	6	1	0	0	1	3
250	6	1	0	0	1	4
250	6		1	1	1	5
250	6	2	1	1	3	6
250	6	1	0	0	1	7
250	6	0	0	0	0	8
250	6	1	0	0	1	9
300	6	0	0	0	0	1
300	6	0	0	0	0	2
300	6	2	0	0	2	3
300	6	0	0	0	0	4
300	6	2	0	0	2	5
300	6	0	0	0	0	6
300	6	0	0	0	0	7
300	6	0	0	0	0	8
300	6	0	0	0	0	9
400	6	0	0	0	0	1
400	6	0	0	0	0	2
400	6	0	0	0	0	3
400	6	0	0	0	0	4
400	6	0	0	0	0	5
400	6	0	0	0	0	6
400	6	0	0	0	0	7
400	6	0	0	0	0	8
400	6	0	0	0	0	9
0	7	1	5	19	6	1
0	7	0	1	16	1	2
0	7	1	4	18	5	3
0	7	0	5	18	5	4
0	7	2	8	18	10	5
0	7	1	5	18	6	6
0	7	2	3	17	5	7
0	7	0	3	19	3	8
0	7	1	3	18	4	9
50	7	0	2	15	2	1
50	7	0	3	15	3	2
50	7	0	2	13	2	3
50	7	1	4	13	5	4
50	7	1	1	16	2	5
50	7	0	0	13	0	6
50	7	0	3	18	3	7
50	7	0	4	15	4	8
50	7	2	4	17	6	9
100	7	0	6	19	6	1
100	7	1	7	18	8	2
100	7	0	1	15	1	3
100	7	1	3	14	4	4
100	7	2	4	15	6	5
100	7	0	1	11	1	6
100	7	0	3	15	3	7
100	7	1	2	15		8
100	7	0	2	16	2	9
150	7	0	2	13	2	1
150	7	0	8	16	8	2
150	7	0	3	13	3	3
150	7	1	4	13	5	4
150	7	1	4	12	5	5
150	7	0	3	14	3	6
150	7	1	2	12	3	7
150	7	2	1	14	3	8
150	7	0	3	17	3	9
200	7	5	2	12	7	1
200	7	1	5	14	6	2
200	7	1	0	5	1	3
200	7	2	1	7	3	4
200	7	0	0	6	0	5
200	7	2	0	9	2	6
200	7	1	3	12	4	7
200	7	3	3	11	6	8
200	7	1	2	11	3	9
250	7	0	1	5	1	1
250	7	1	1	3	2	2
250	7	0	0	0	0	3
250	7	1	0	0	1	4
250	7	0	0	1	0	5
250	7	0	1	2	1	6
250	7	1	0	0	1	7
250	7	0	0	0	0	8
250	7	0	1	1	1	9
300	7	1	0	0	1	1
300	7	0	0	0	0	2
300	7	0	0	0	0	3
300	7	0	0	0	0	4
300	7	2	0	0	2	5
300	7	0	0	0	0	6
300	7	0	0	0	0	7
300	7	0	0	0	0	8
300	7	0	0	0	0	9
400	7	0	0	0	0	1
400	7	0	0	0	0	2
400	7	0	0	0	0	3
400	7	0	0	0	0	4
400	7	0	0	0	0	5
400	7	0	0	0	0	6
400	7	0	0	0	0	7
400	7	0	0	0	0	8
400	7	0	0	0	0	9
0	8	0	0	19	0	1
0	8	0	0	16	0	2
0	8	0	1	19	1	3
0	8	0	0	18	0	4
0	8	1	1	19	2	5
0	8	0	1	19	1	6
0	8	0	1	18	1	7
0	8	0	1	20	2	8
0	8	0	0	18	0	9
50	8	0	0	15	0	1
50	8	0	0	15	0	2
50	8	0	0	13	0	3
50	8	0	1	14	1	4
50	8	0	0	16	0	5
50	8	0	0	13	0	6
50	8	0	0	18	0	7
50	8	0	0	15	0	8
50	8	1	0	17	1	9
100	8	0	0	19	0	1
100	8	0	0	18	0	2
100	8	0	0	15	0	3
100	8	0	0	14	0	4
100	8	0	1	16	1	5
100	8	0	0	11	0	6
100	8	0	0	15	0	7
100	8	0	1	16	1	8
100	8	0	0	16	0	9
150	8	0	0	13	0	1
150	8	0	0	16	0	2
150	8	0	0	13	0	3
150	8	0	0	13	0	4
150	8	1	0	12	1	5
150	8	0	0	14	0	6
150	8	1	0	12	1	7
150	8	0	0	14	0	8
150	8	0	0	17	0	9
200	8	4	1	13	5	1
200	8	1	0	14	0	2
200	8	0	0	5	0	3
200	8	0	2	9	2	4
200	8	0	0	6	0	5
200	8	1	1	10	0	6
200	8	0	1	13	1	7
200	8	1	2	13	3	8
200	8	0	1	12	1	9
250	8	0	0	5	0	1
250	8	0	1	4	1	2
250	8	0	0	0	0	3
250	8	0	0	0	0	4
250	8	0	0	1	0	5
250	8	0	0	2	0	6
250	8	0	0	0	0	7
250	8	0	0	0	0	8
250	8	0	0	1	0	9
300	8	0	0	0	0	1
300	8	0	0	0	0	2
300	8	1	0	0	1	3
300	8	0	0	0	0	4
300	8	2	0	0	2	5
300	8	0	0	0	0	6
300	8	0	0	0	0	7
300	8	0	0	0	0	8
300	8	0	0	0	0	9
400	8	0	0	0	0	1
400	8	0	0	0	0	2
400	8	0	0	0	0	3
400	8	0	0	0	0	4
400	8	0	0	0	0	5
400	8	0	0	0	0	6
400	8	0	0	0	0	7
400	8	0	0	0	0	8
400	8	0	0	0	0	9

## Sheet: Figure 2
Figure 2 - Genomic coordinates of ppk genes identified in the AaegL5 genome assembly
Gene name	NCBI accession	Assembly version	Scaffold type	Chromosome #	Scaffold accession	Start (bp)	Stop (bp)	Strand	Notes
ppk101	LOC5579136	GCF_002204515.2	chromosome	1	NC_035107.1	57568787	57583873	-
ppk102	LOC5579133	GCF_002204515.2	chromosome	1	NC_035107.1	57611979	57626595	-
ppk103	LOC5580165	GCF_002204515.2	chromosome	1	NC_035107.1	228445865	228483104	+
ppk201	LOC110675789	GCF_002204515.2	chromosome	2	NC_035108.1	95589782	95609185	+
ppk202	LOC5577387	GCF_002204515.2	chromosome	2	NC_035108.1	174985363	175035682	+
ppk203	LOC110676298	GCF_002204515.2	chromosome	2	NC_035108.1	197617141	197631778	+
ppk204	LOC5573846	GCF_002204515.2	chromosome	2	NC_035108.1	305065798	305077453	-
ppk205	LOC5573493	GCF_002204515.2	chromosome	2	NC_035108.1	314423363	314462813	+
ppk206	LOC5568179	GCF_002204515.2	chromosome	2	NC_035108.1	463027538	463039524	+
ppk301	LOC5564307	GCF_002204515.2	chromosome	3	NC_035109.1	11821895	11872664	+
ppk302	LOC5567669	GCF_002204515.2	chromosome	3	NC_035109.1	62659555	62662483	+
ppk303	LOC5571072	GCF_002204515.2	chromosome	3	NC_035109.1	133014318	133016180	+
ppk304	LOC110679246	GCF_002204515.2	chromosome	3	NC_035109.1	206389656	206402302	+
ppk305	LOC5578185	GCF_002204515.2	chromosome	3	NC_035109.1	221332836	221338222	+
ppk306	LOC5563925	GCF_002204515.2	chromosome	3	NC_035109.1	287471641	287473923	+
ppk307	LOC110678433	GCF_002204515.2	chromosome	3	NC_035109.1	287504756	287505626	+
ppk308	LOC5563927	GCF_002204515.2	chromosome	3	NC_035109.1	287506546	287508483	-
ppk309	LOC5574232	GCF_002204515.2	chromosome	3	NC_035109.1	287526121	287527835	-
ppk310	LOC5574233	GCF_002204515.2	chromosome	3	NC_035109.1	287542609	287543534	-
ppk311	LOC5574234	GCF_002204515.2	chromosome	3	NC_035109.1	287550595	287552355	+
ppk312	LOC5574235	GCF_002204515.2	chromosome	3	NC_035109.1	287645697	287648808	-
ppk313	LOC5576775	GCF_002204515.2	chromosome	3	NC_035109.1	296876337	296891140	-
ppk314	LOC110679504	GCF_002204515.2	chromosome	3	NC_035109.1	296895228	296896916	-
ppk315	LOC5567215	GCF_002204515.2	chromosome	3	NC_035109.1	333861556	333864180	-
ppk316	LOC5567201	GCF_002204515.2	chromosome	3	NC_035109.1	334691554	334693496	-
ppk317	LOC5567199	GCF_002204515.2	chromosome	3	NC_035109.1	334720294	334722711	+
ppk318	LOC5569956	GCF_002204515.2	chromosome	3	NC_035109.1	359666046	359669272	-
ppk319	LOC5563697	GCF_002204515.2	chromosome	3	NC_035109.1	384775729	384777142	-
ppk320	LOC5563696	GCF_002204515.2	chromosome	3	NC_035109.1	384785549	384787266	+
ppk321	LOC5563698	GCF_002204515.2	chromosome	3	NC_035109.1	384833652	384836798	-
ppk322	LOC5564136	GCF_002204515.2	chromosome	3	NC_035109.1	402064083	402075970	+
ppk323_dup_of_305	LOC110681215	GCF_002204515.2	unplaced scaffold	NA	NW_018736250.1	29788	34901	-	This is likely an allelic variation of ppk305, assembled on an unplaced scaffold

## Sheet: Figure 3A
Figure 3A - blood-feeding rates for cups of female mosquitoes of the indicated genotype given access to a human arm
Replicate	Genotype	Proportion of animals blood-fed
cup1	wild-type	1
cup2	wild-type	1
cup3	wild-type	1
cup4	wild-type	0.9
cup5	wild-type	1
cup6	wild-type	1
cup1	ppk301	1
cup2	ppk301	1
cup3	ppk301	1
cup4	ppk301	1
cup5	ppk301	0.9
cup6	ppk301	1
cup7	ppk301	0.8
cup8	ppk301	1
cup9	ppk301	1
cup10	ppk301	1
cup11	ppk301	1
cup12	ppk301	0.9
cup1	ppk204	0.8
cup2	ppk204	0.8
cup3	ppk204	1
cup4	ppk204	1
cup5	ppk204	0.8
cup6	ppk204	0.6
cup1	ppk316	0.9
cup2	ppk316	0.8
cup3	ppk316	0.9
cup4	ppk316	0.7
cup5	ppk316	1
cup6	ppk316	1
cup1	ppk306	0.8
cup2	ppk306	0.9
cup3	ppk306	1
cup4	ppk306	0.7
cup5	ppk306	1
cup6	ppk306	0.8

## Sheet: Figure 3B
Figure 3B - percentage of female mosquitoes of the indicated genotype who laid >10 eggs after a full blood-meal when given access to freshwater
Replicate	Genotype	Proportion of blood-fed female mosquitoes laying > 10 eggs
cup1	LVP	1
cup2	LVP	0.8
cup3	LVP	1
cup4	LVP	0.666667
cup5	LVP	0.8
cup6	LVP	0.7
cup1	ppk301	0.3
cup2	ppk301	0.4
cup3	ppk301	0.6
cup4	ppk301	0.5
cup5	ppk301	0.428571
cup6	ppk301	0.285714
cup7	ppk301	0.125
cup8	ppk301	0.2
cup9	ppk301	0.2
cup10	ppk301	0.3
cup11	ppk301	0.4
cup12	ppk301	0.333333
cup1	ppk204	0.857143
cup2	ppk204	0.625
cup3	ppk204	0.6
cup4	ppk204	0.666667
cup5	ppk204	0.5
cup6	ppk204	0.833333
cup1	ppk316	1
cup2	ppk316	0.8
cup3	ppk316	1
cup4	ppk316	1
cup5	ppk316	1
cup6	ppk316	1
cup1	ppk306	0.875
cup2	ppk306	0.714286
cup3	ppk306	0.857143
cup4	ppk306	0.857143
cup5	ppk306	0.777778
cup6	ppk306	0.666667

## Sheet: Figure 3C
Figure 3C - number of fully developed embryos present in the ovaries of individual mosquitoes of the indicated genotype, 72 hours after a full blood-meal
Genotype	Hours after blood-feeding	Number of embryos (all stage 4)
wild-type	72	103
wild-type	72	90
wild-type	72	84
wild-type	72	79
wild-type	72	88
wild-type	72	94
wild-type	72	105
wild-type	72	104
ppk301	72	87
ppk301	72	103
ppk301	72	92
ppk301	72	80
ppk301	72	97
ppk301	72	67
ppk301	72	93
ppk301	72	88
ppk301	72	78
ppk301	72	91
ppk301	72	107
ppk301	72	94
ppk301	72	110
ppk301	72	114
ppk301	72	112
ppk301	72	112

[truncated: 18 more sheets: Figure 3D-E, Figure 3F, Figure 3G-J, Fig. 5E-F WT 0mOsm, Fig. 5E-F WT 200mOsm, Fig. 5E-F WT 300mOsm, Fig. 5E-F Mutant 0mOsm, Fig. 5E-F Mutant 200mOsm, Fig. 5E-F Mutant 300mOsm, Fig. 6B - animal 1, Fig. 6B - animal 2, Fig. 6B - animal 3, Fig. 6B - animal 4, Fig. 6B - animal 5, Fig. 6B - animal 6, Fig. 6B - animal 7, Figure 6C-D, Figure 7A]
