# Supplementary figures and images for: The ion channel ppk301 controls freshwater egg-laying in the mosquito Aedes aegypti
Source: eLife journal article supplement (doi:10.7554/elife.43963), 2019-05-21

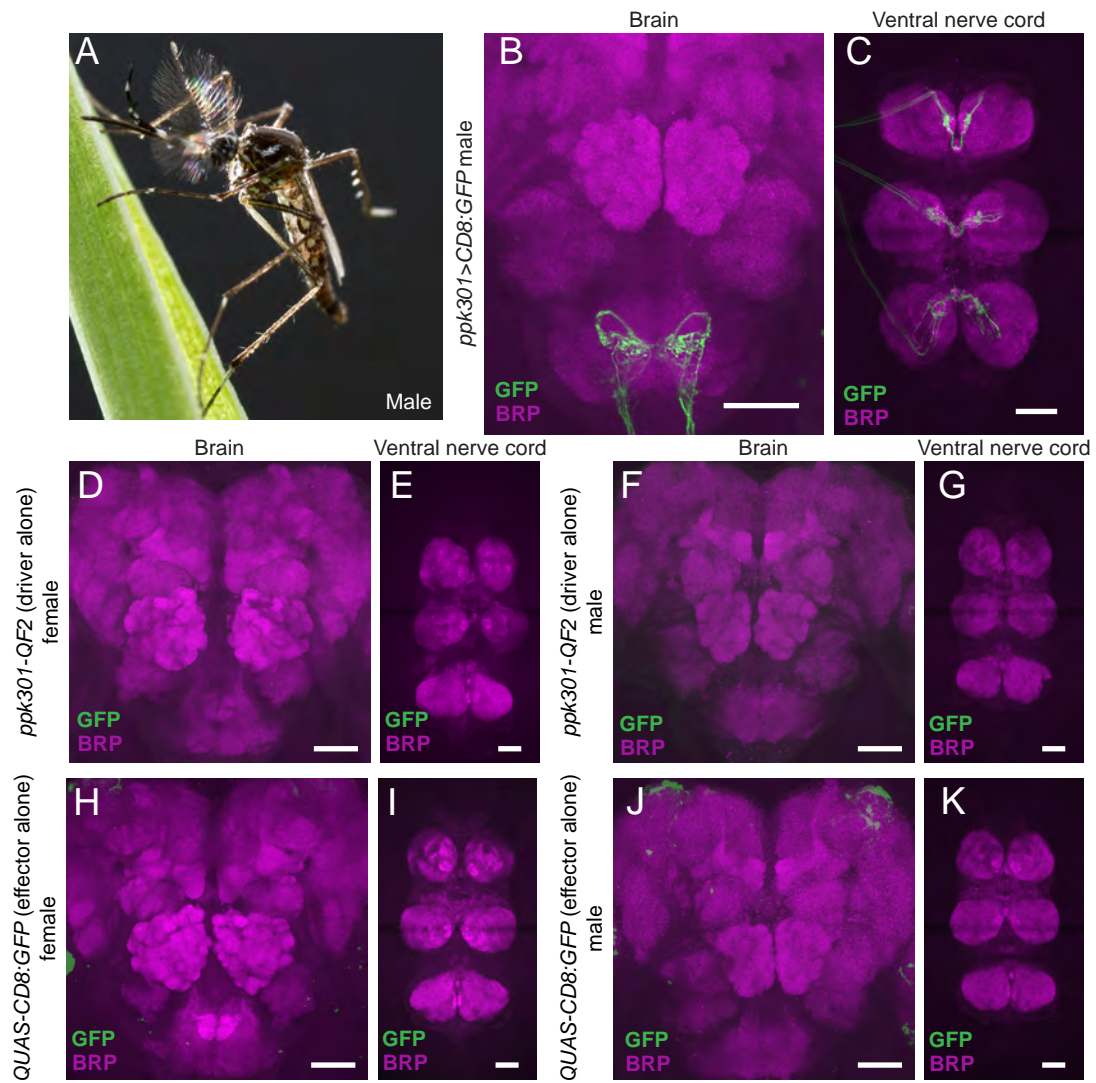

Supplement: supp [file elife-43963-supp-v1.zip]
